# Supplementary material for: A facile soft template method to synthesize hollow carbon and MnOx composite particles for effective methylene blue degradation
Source: Royal Society of Chemistry journal article supplement (doi:10.1039/c8ra04960b), 2018-01-01
Supplement: c8ra04960b1.pdf [file c8ra04960b1.pdf]

## Supporting information for:

A facile soft template method to synthesize hollow  
carbon and MnO<sub>x</sub> composite particles for effective  
methylene blue degradation

Qingnan Meng<sup>1\*</sup>, Lulu Du<sup>1</sup>, Yeye Ji<sup>1</sup>, Yufei Tang<sup>1</sup>, Zhenhua Han<sup>1</sup>, Kang Zhao<sup>1\*</sup>, Guojun Zhang<sup>1</sup>

1. School of Material Science and Engineering, Xi'an University of Technology, Xi'an, 710048, P.

R. China

\*Corresponding author. E-mail address: mengqn@xaut.edu.cn (Q. Meng); kzha@xaut.edu.cn (K. Zhao).

**Table S1** Comparison of the catalytic performance for degradation of MB by different manganese oxide based catalysts under similar reaction conditions.

| Ref.       | Catalyst                                                  | Reaction Condition                                   | H <sub>2</sub> O <sub>2</sub> added per 100ml MB (mL) | Mn loading (g/L) | Degradation efficiency (%) |
|------------|-----------------------------------------------------------|------------------------------------------------------|-------------------------------------------------------|------------------|----------------------------|
| 1.         | Mn <sub>3</sub> O <sub>4</sub>                            | MB (100 mg/L, 20 mL), 75 °C, 90 min                  | 75                                                    | 0.7203           | 99.7                       |
| 2.         | Mn <sub>3</sub> O <sub>4</sub>                            | MB (100 mg/L, 20 mL), 80 °C, 180 min                 | 75                                                    | 0.7203           | 99.7                       |
| 3.         | Mn <sub>3</sub> O <sub>4</sub> nanorods                   | MB (100 mg/L, 50 mL), 80 °C, 60 min                  | 40                                                    | 0.1441           | 95                         |
| 4.         | MnO                                                       | MB (100 mg/L, 50 mL), 80 °C, 60 min                  | 40                                                    | 0.1549           | 91.6                       |
|            | Mn <sub>2</sub> O <sub>3</sub>                            |                                                      |                                                       | 0.1392           | 76.0                       |
|            | Mn <sub>3</sub> O <sub>4</sub>                            |                                                      |                                                       | 0.1441           | 99.3                       |
|            | MnO <sub>2</sub>                                          |                                                      |                                                       | 0.1264           | 66.8                       |
| 5.         | Mn <sub>3</sub> O <sub>4</sub> -MnO <sub>2</sub> nanorods | MB (10 mg/L, 100 mL), 80 °C, 60 min                  | 20                                                    | 0.0678           | 99.5                       |
| 6.         | MnO <sub>x</sub> and carbon composite                     | MB (100mg/L, 50 mL), catalyst (10 mg), 80 °C, 60 min | 20                                                    | 0.0230           | 96.0                       |
| This study | SC-Mn-0.3                                                 | MB (100mg/L, 50 mL), 80 °C, 50 min                   | 6                                                     | 0.0114           | 21.5                       |
|            | HC-Mn-0.5                                                 |                                                      |                                                       | 0.0180           | 88.3                       |
|            | HC-Mn-0.7                                                 |                                                      |                                                       | 0.0242           | 94.5                       |

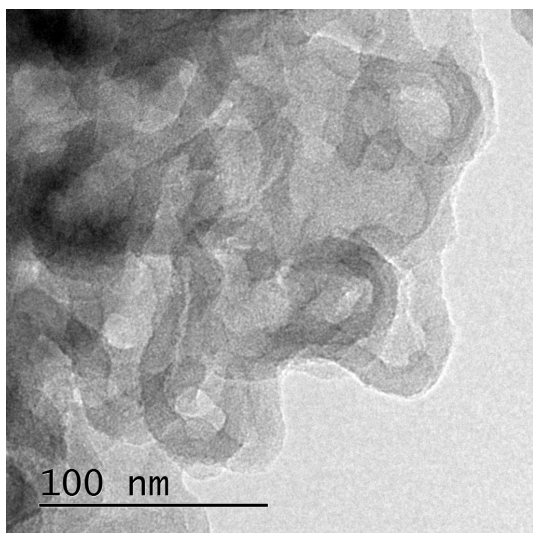

**Fig. S1** TEM image of the HC-Mn-0.7 after the cycling tests.

## References

1. L. Peng, J. L. Zhang, Z. M. Xue, B. X. Han, J. S. Li and G. Y. Yang, *Chem. Commun.*, 2013, **49**, 11695.
2. P. Q. Zhang, Y. G. Zhan, B. X. Cai, C. C. Hao, J. Wang, C. X. Liu, Z. J. Meng, Z. L. Yin and Q. Y. Chen, *Nano. Res.*, 2010,**3**, 235.
3. Z. C. Bai, B. Sun, N. Fan, Z. C. Ju, M. H. Li, L. Q. Xu and Y. T. Qian, *Chem. Eur. J.*, 2012, **18**, 5319.
4. B. Debnath, A. S. Roy, S. Kapri and S. Bhattacharyya, *Chemistry select.*, 2016, **1**, 4265.
5. R. C. Yang, T. X. Tao, Y. M. Dai, Z. M. Chen, X. Zhang and Q. W. Song, *Catal. Commun.*, 2015, **60**, 96.
6. Q. N. Meng, L. L. Du, J. Yang, Y. F. Tang, Z. H. Han, K. Zhao and G. J. Zhang, *Colloid. Surface. A*, 2018, **548**, 142.
